# Supplementary material
Source: PubMed Central journal article supplement (PMC4313230)
Supplement: JCM.02400-14_zjm999093809so1.pdf [file JCM.02400-14_zjm999093809so1.pdf]

**Acceleration of Antimicrobial Susceptibility Testing from Positive Blood Cultures by  
Inoculation of Shortly Incubated Solid Medium Cultures into Vitek 2**

Evgeny A. Idelevich, Isabel Schüle, Barbara Grünastel, Jörg Wüllenweber, Georg Peters,  
Karsten Becker

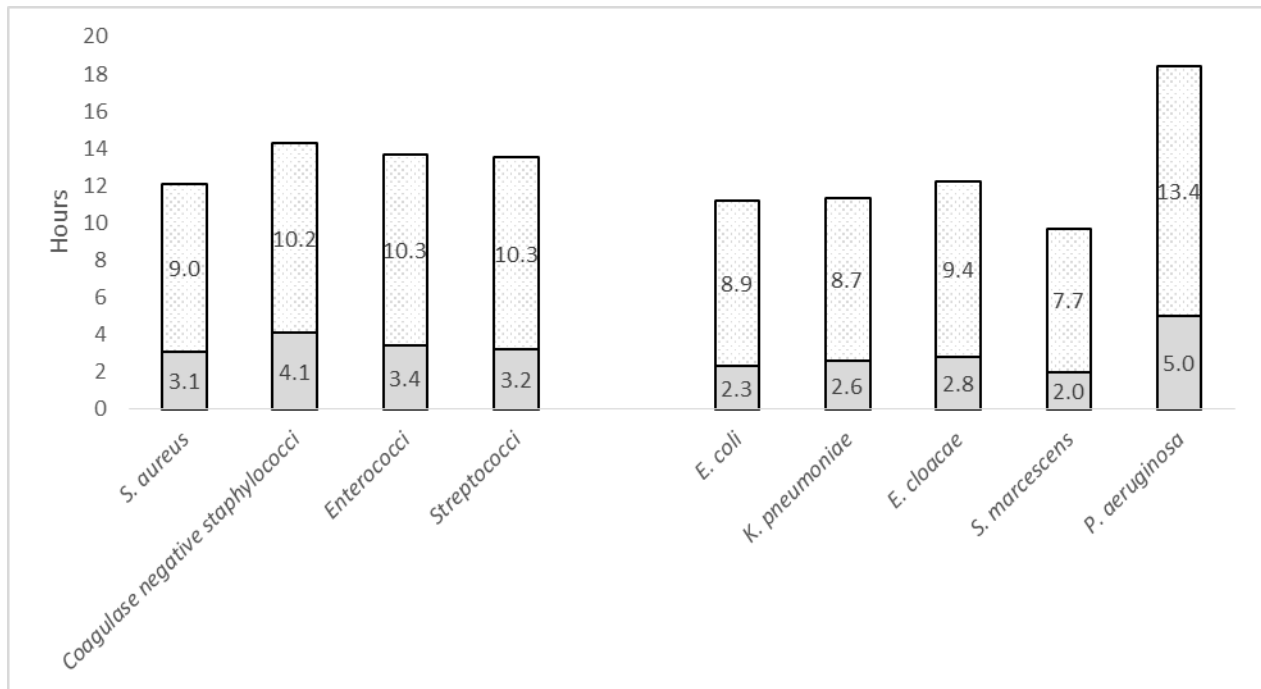

**Figure S1.** Mean times to AST result for different bacterial species or groups, composed of cultivation times to inoculation of Vitek 2 (dark bars at the bottom) and duration of Vitek 2 AST (light bars at the top), hours.
